# Supplementary material
Source: PubMed Central journal article supplement (PMC2723680)
Supplement: 125_2009_1415_MOESM2_ESM.pdf [file 125_2009_1415_MOESM2_ESM.pdf]

## Electronic supplementary material

**ESM Table 2** Summary of treatment-emergent adverse events by System Organ Class (SOC) that occurred with an incidence of at least 5% in the insulin glargine group, and that differed in incidence between treatment groups by 1% or more (safety population)

| SOC                             | Data for insulin glargine difference<br>≥1% vs NPH insulin |                                 | SOC                               | Data for NPH insulin difference<br>≥1% vs insulin glargine |                                 |
|---------------------------------|------------------------------------------------------------|---------------------------------|-----------------------------------|------------------------------------------------------------|---------------------------------|
|                                 | Insulin glargine<br>( <i>n</i> =514)                       | NPH insulin<br>( <i>n</i> =503) |                                   | Insulin glargine<br>( <i>n</i> =514)                       | NPH insulin<br>( <i>n</i> =503) |
| Cataract                        | 93 (18.1)                                                  | 80 (15.9)                       | Upper respiratory tract infection | 149 (29.0)                                                 | 169 (33.6)                      |
| Bronchitis                      | 78 (15.2)                                                  | 71 (14.1)                       | Oedema peripheral                 | 103 (20.0)                                                 | 114 (22.7)                      |
| Cough                           | 62 (12.1)                                                  | 37 (7.4)                        | Arthralgia                        | 73 (14.2)                                                  | 81 (16.1)                       |
| Muscle spasms                   | 47 (9.1)                                                   | 35 (7.0)                        | Musculoskeletal pain              | 44 (8.6)                                                   | 51 (10.1)                       |
| Nausea                          | 44 (8.6)                                                   | 34 (6.8)                        | Hypoglycaemia                     | 36 (7.0)                                                   | 48 (9.5)                        |
| Gastroenteritis viral           | 41 (8.0)                                                   | 30 (6.0)                        | Chest pain                        | 32 (6.2)                                                   | 41 (8.2)                        |
| Gastroesophageal reflux disease | 41 (8.0)                                                   | 34 (6.8)                        | Pneumonia                         | 30 (5.8)                                                   | 36 (7.2)                        |
| Fatigue                         | 41 (8.0)                                                   | 30 (6.0)                        | Pharyngolaryngeal pain            | 29 (5.6)                                                   | 35 (7.0)                        |
| Dizziness                       | 38 (7.4)                                                   | 29 (5.8)                        | Osteoarthritis                    | 29 (5.6)                                                   | 37 (7.4)                        |
| Hyperlipidaemia                 | 37 (7.2)                                                   | 22 (4.4)                        | Dyspnea                           | 27 (5.3)                                                   | 33 (6.6)                        |
| Sensory disturbance             | 27 (5.3)                                                   | 17 (3.4)                        | Neoplasms                         | 57 (11.1)                                                  | 62 (12.3)                       |
| Anxiety                         | 26 (5.1)                                                   | 18 (3.6)                        |                                   |                                                            |                                 |

Data are *n* (%)
